# Supplementary material for: Beneficial Bacteria Isolated from Grapevine Inner Tissues Shape Arabidopsis thaliana Roots
Source: PLoS One. 2015 Oct 16;10(10):e0140252. doi: 10.1371/journal.pone.0140252 (PMC4652591; doi:10.1371/journal.pone.0140252)
Supplement: S1 Table — (XLSX) [file pone.0140252.s003.xlsx]

## Sheet: S1
S1 Table. Overview of PGP tested activities, cluster attribution and taxonomic identification of all isolated strains
strains	Phosphate solubilizers	Ammonia producers	IAA producers [ μg mL-1]	Siderophore producers	CMCa degraders	mclust b	Taxonomy
1	-	-	-	+	+	2	Bacillus sp.
2	-	+	-	-	+	2	Bacillus sp.
3	-	-	-	-	+	2	Bacillus sp.
4	+	-	-	-	+	2	Bacillus sp.
5	-	-	-	+	+	4	Micrococcus sp.
6	+	-	-	-	+	2	Bacillus sp.
7	-	-	16.5	-	+	4	Bacillus sp.
8	-	-	-	-	+	1	Bacillus sp.
9	-	-	-	-	+	2	Bacillus sp.
10	-	+	-	+	+	1	Pantoea ananatis
11	-	-	-	-	-	2	Lysinibacillus fusiformis
12	+	+	-	-	+	4	Pantoea ananatis
13	-	-	1.2	+	-	1	Agrococcus baldri
14	-	-	-	-	-	4	Lysinibacillus fusiformis
15	-	-	-	+	-	4	Agrococcus baldri
16	-	-	-	-	-	ngs c	Bacillus siralis
17	-	-	-	-	-	2	Bacillus sp.
18	-	+	-	-	+	3	Bacillus herbersteinensis
19	-	-	-	-	+	2	Bacillus sp.
20	+	+	31.6	-	+	2	Bacillus sp.
21	-	-	-	+	+	2	Lysinibacillus fusiformis
22	-	-	-	+	+	2	Bacillus sp.
23	-	-	-	+	+	1	Bacillus sp.
24	-	-	28.8	-	+	2	Paenibacillus sp. CH-3
25	-	-	-	+	-	2	Bacillus sp.
26	-	-	-	-	-	ngs	Micrococcus sp.
27	-	-	-	-	+	2	Micrococcus sp.
28	-	-	-	-	-	ngs	Bacillus sp.
29	-	-	-	+	+	2	Paenibacillus
30	-	+	-	-	-	1	Bacillus sp.
31	-	-	-	+	+	2	Bacillus sp.
32	-	-	-	-	-	2	Bacillus sp.
33	-	-	-	-	-	2	Bacillus sp.
35	-	-	-	+	-	5	Bacillus sp.
36	-	+	-	-	-	5	Bacillus sp.
37	-	-	-	-	-	1	Bacillus sp.
38	-	+	-	+	-	1	Bacillus sp.
39	-	-	-	-	-	2	Bacillus sp.
40	-	-	-	-	-	4	Paenibacillus sp. CH-4
41	+	+	-	+	-	2	Bacillus sp.
44	-	-	-	-	+	4	Staphylococcus epidermidis
45	-	-	-	-	+	4	Staphylococcus epidermidis
46	-	-	-	-	+	5	Staphylococcus
47	-	-	-	-	+	5	Staphylococcus epidermidis
48	-	-	-	-	-	1	Staphylococcus
52	+	+	-	-	-	ngs	Paenibacillus
53	-	+	-	-	-	ngs	Stenotrophomonas
54	-	-	-	-	+	1	Agrococcus baldri
55	-	-	-	-	-	ngs	Agrococcus baldri
56	-	-	-	-	-	2	Bacillus idriensis
57	-	+	-	-	+	2	Bacillus idriensis
59	-	-	-	-	-	2	Paenibacillus sp. CH-5
60	-	-	-	+	-	2	Bacillus sp.
61	-	-	-	+	+	5	Bacillus sp.
62	-	+	-	-	+	2	Bacillus siralis
63	-	+	-	-	+	ngs	Bacillus idriensis
64	-	+	-	-	+	ngs	Bacillus idriensis
66	-	+	-	-	+	4	Bacillus siralis
67	-	-	-	+	-	3	Bacillus sp.
68	-	-	-	-	-	3	Micrococcus
69	+	-	-	-	-	ngs	Paenibacillus
70	+	+	-	+	-	4	Bacillus sp.
71	-	-	-	-	+	2	Paenibacillus sp. CH-6
72	-	+	-	-	-	3	Micrococcus
73	-	+	-	+	+	ngs	Variovorax paradoxus
74	-	+	-	-	-	2	Micrococcus
75	+	+	-	+	-	5	Bacillus sp.
76	-	-	-	-	+	3	Paenibacillus lautus
77	+	-	-	-	-	3	Paenibacillus sp. CH-7
78	-	-	-	-	-	ngs	Variovorax paradoxus
79	-	-	-	+	-	3	Bacillus sp.
80	-	-	-	-	+	4	Bacillus siralis
82	-	-	-	-	+	4	Bacillus sp.
83	+	+	79.8	+	+	1	Pantoea agglomerans
84	+	+	-	-	-	ngs	Agrococcus baldri
86	-	-	-	-	-	ngs	Pantoea ananatis
87	+	-	-	-	+	5	Pantoea ananatis
88	-	-	-	-	+	ngs	Bacillus siralis
89	-	-	-	-	+	5	Microbacterium flavum
90	+	-	5.4	+	-	5	Microbacterium flavum
91	-	-	-	+	+	4	Bacillus sp.
92	-	+	-	+	-	4	Bacillus thuringiensis
93	-	-	-	-	+	1	Paenibacillus lautus
94	-	-	-	-	+	4	Bacillus siralis
95	-	-	-	+	+	2	Bacillus sp.
96	-	-	-	+	+	1	Bacillus herbersteinensis
97	+	-	-	+	+	3	Bacillus sp.
98	+	-	-	+	+	3	Bacillus sp.
99	+	+	-	+	-	3	Bacillus sp.
100	+	-	-	+	+	3	Bacillus sp.
101	+	-	-	+	-	ngs	Bacillus sp.
103	+	-	-	-	+	2	Micrococcus
104	-	-	-	-	-	2	Variovorax paradoxus
106	-	-	-	-	-	ngs	Agrococcus baldri
107	+	-	-	+	-	3	Variovorax paradoxus
109	-	-	-	+	-	ngs	Variovorax paradoxus
111	-	-	-	-	+	3	Variovorax paradoxus
112	+	-	-	-	-	ngs	Variovorax paradoxus
113	-	+	54.1	-	+	3	Variovorax paradoxus
114	-	-	-	-	-	ngs	Variovorax paradoxus
115	-	+	-	+	-	ngs	Variovorax paradoxus
116	-	+	-	-	+	1	Variovorax paradoxus
117	-	+	-	-	-	ngs	Variovorax paradoxus
118	-	+	-	-	-	ngs	Variovorax paradoxus
119	-	-	-	-	-	1	Bacillus simplex
120	-	+	-	-	-	ngs	Bacillus sp.
121	-	-	-	-	-	ngs	Bacillus sp.
122	-	-	-	+	+	5	Bacillus siralis
123	-	-	-	+	+	2	Paenibacillus lautus
124	-	-	-	-	-	5	Staphylococcus epidermidis
125	-	+	-	-	+	5	Bacillus siralis
126	-	+	-	+	+	ngs	Bacillus sp.
127	+	+	-	+	+	4	Bacillus sp.
128	-	-	-	-	-	ngs	Pantoea ananatis
129	-	-	-	-	-	ngs	Pantoea ananatis
130	+	+	-	+	-	5	Mesorhizobium albiziae
131	-	+	-	+	+	4	Micrococcus
132	-	+	-	+	+	2	Micrococcus
133	-	+	-	+	+	1	Micrococcus
134	+	+	-	+	+	1	Micrococcus
135	-	-	-	-	-	ngs	Mesorhizobium albiziae
136	-	+	-	+	+	4	Micrococcus
137	-	-	-	-	-	3	Bacillus sp.
138	+	+	-	-	+	3	Bacillus sp.
139	+	+	-	-	+	4	Bacillus sp.
140	-	+	-	+	+	3	Bacillus sp.
141	+	-	-	-	-	4	Mesorhizobium albiziae
142	+	-	-	-	-	3	Mesorhizobium albiziae
143	+	-	-	-	-	3	Stenotrophomonas panacihumi
144	+	+	-	+	-	ngs	Stenotrophomonas panacihumi
145	+	+	-	+	-	4	Micrococcus luteus
146	+	+	-	+	+	5	Stenotrophomonas panacihumi
147	+	+	-	+	+	3	Stenotrophomonas panacihumi
152	+	+	-	+	+	ngs	Bacillus sp.
153	+	+	-	+	-	3	Bacillus sp.
154	-	+	-	+	+	1	Bacillus siralis
155	-	-	-	+	-	2	Paenibacillus sp. CH-8
156	-	-	-	-	-	5	Paenibacillus
158	-	+	-	+	-	4	Bacillus sp.
159	-	-	-	+	-	4	Micrococcus luteus
160	-	-	-	+	-	4	Micrococcus luteus
161	-	+	-	-	-	3	Micrococcus luteus
162	-	+	-	-	-	4	Micrococcus luteus
163	-	+	-	-	-	2	Bacillus thuringiensis
164	-	+	-	+	-	1	Bacillus sp.
165	+	-	-	+	-	4	Bacillus sp.
166	+	-	-	-	-	4	Bacillus sp.
167	+	+	-	-	-	5	Bacillus sp.
168	+	+	-	-	+	3	Micrococcus
169	+	+	-	-	-	3	Bacillus sp.
170	-	+	-	-	-	3	Micrococcus
171	-	+	-	+	-	ngs	Bacillus sp.
172	+	+	-	-	-	3	Bacillus sp.
173	+	-	-	-	-	3	Staphylococcus epidermidis
174	-	+	1.2	-	-	3	Bacillus licheniformis
175	+	+	-	+	-	5	Bacillus sp.
176	+	-	-	+	-	1	Bacillus sp.
177	-	+	-	-	-	1	Bacillus sp.
178	+	+	-	+	-	4	Bacillus safensis FO-36b
179	+	+	-	+	-	4	Bacillus sp.
180	+	+	-	+	+	2	Bacillus sp.
181	+	+	-	-	-	2	Bacillus sp.
182	-	+	-	+	-	5	Bacillus sp.
183	-	+	-	+	-	5	Bacillus sp.
184	-	+	-	+	-	2	Bacillus siralis
185	+	+	-	-	-	5	Bacillus herbersteinensis
186	+	+	-	-	-	2	Bacillus herbersteinensis
187	+	+	-	+	-	2	Bacillus herbersteinensis
188	-	+	-	-	-	ngs	Bacillus sp.
189	+	+	-	-	-	5	Microbacterium flavum
190	+	-	-	-	-	6	Bacillus sp.
192	-	-	-	-	-	ngs	Microbacterium pumilum
194	-	+	-	-	-	ngs	Microbacterium pumilum
196	-	-	-	+	-	2	Bacillus mycoides
197	-	-	-	-	-	ngs	Microbacterium flavum
198	-	-	-	-	-	ngs	Mesorhizobium albiziae
199	-	+	-	-	-	1	Mesorhizobium albiziae
200	-	-	-	-	-	1	Microbacterium pumilum
201	-	-	-	-	-	5	Microbacterium flavum
202	-	-	-	-	-	ngs	Microbacterium flavum
203	-	-	-	+	-	2	Microbacterium flavum
204	+	+	-	+	-	1	Pseudoxanthomonas mexicana
205	+	+	-	-	-	1	Pseudoxanthomonas mexicana
206	-	-	-	-	-	2	Pantoea ananatis
207	-	-	-	-	-	5	Bacillus sp.
208	+	+	-	-	-	6	Pseudoxanthomonas mexicana
209	-	-	-	-	+	5	Bacillus sp.
210	-	-	-	-	-	ngs	Pseudoxanthomonas mexicana
211	-	-	-	-	-	ngs	Staphylococcus epidermidis
212	-	-	-	-	-	2	Bacillus herbersteinensis
213	-	-	-	+	-	ngs	Bacillus sp.
214	-	-	-	-	-	2	Agrococcus baldri
215	+	-	-	-	-	5	Bacillus sp.
216	+	-	-	-	-	2	Staphylococcus
217	-	-	-	-	-	5	Staphylococcus
218	+	-	-	+	-	5	Staphylococcus
220	+	+	2.4	+	-	ngs	Staphylococcus
221	+	+	-	+	-	ngs	Staphylococcus
222	+	+	1.1	-	-	ngs	Staphylococcus
223	+	+	-	-	-	ngs	Staphylococcus
224	-	-	-	-	-	2	Staphylococcus
225	-	-	-	+	-	2	Bacillus sp.
226	-	+	-	+	+	1	Bacillus sp.
227	-	-	-	-	-	ngs	Bacillus sp.
228	-	+	-	-	-	ngs	Bacillus sp.
229	-	-	-	-	-	ngs	Bacillus sp.
230	-	-	-	-	-	ngs	Pantoea ananatis
231	-	-	-	+	-	ngs	Bacillus sp.
232	-	+	-	+	-	ngs	Bacillus sp.
233	-	-	-	-	-	ngs	Paenibacillus
234	-	-	-	-	-	ngs	Bacillus psychrodurans
235	-	-	-	-	-	ngs	Pseudoxanthomonas mexicana
236	-	-	-	-	-	ngs	Pseudoxanthomonas mexicana
251	-	-	-	-	-	ngs	Mesorhizobium albiziae
252	-	-	-	-	-	ngs	Bacillus safensis FO-36b
253	-	-	-	-	-	6	Bacillus idriensis
256	-	+	-	+	-	1	Bacillus idriensis
257	-	+	-	+	-	2	Bacillus idriensis
258	-	-	-	-	-	ngs	Bacillus idriensis
260	+	-	-	-	-	ngs	Bacillus idriensis
261	-	+	-	+	-	ngs	Bacillus idriensis
262	-	+	-	+	-	ngs	Bacillus idriensis
263	-	+	-	-	-	ngs	Bacillus idriensis
264	+	-	-	-	-	ngs	Bacillus idriensis
265	+	-	-	-	-	ngs	Bacillus idriensis
266	-	-	-	-	-	ngs	Bacillus idriensis
267	-	-	-	-	-	ngs	Bacillus idriensis
268	-	-	-	-	-	ngs	Bacillus idriensis
269	-	-	-	-	-	ngs	Bacillus idriensis
270	-	-	-	-	-	ngs	Bacillus idriensis
271	-	+	-	-	-	5	Bacillus idriensis
272	-	+	-	-	-	ngs	Bacillus idriensis
274	-	-	-	+	-	ngs	Bacillus idriensis
275	+	-	-	+	-	6	Curtobacterium
276	-	-	-	-	-	ngs	Bacillus sp.
277	+	-	-	-	-	5	Paenibacillus
278	+	-	-	-	-	5	Staphylococcus epidermidis
279	+	-	-	-	-	ngs	Curtobacterium
280	-	+	-	-	-	ngs	Curtobacterium
281	-	-	-	+	-	2	Curtobacterium
282	+	-	-	-	-	5	Bacillus safensis FO-36b
283	+	+	-	-	+	ngs	Curtobacterium
284	+	-	-	-	-	5	Paenibacillus
285	+	-	-	+	+	5	Paenibacillus
286	+	+	-	+	-	2	Bacillus sp.
287	+	+	16.2	+	+	5	Bacillus sp.
288	+	-	-	+	+	1	Bacillus sp.
289	+	-	-	+	-	5	Bacillus sp.
290	-	+	-	-	-	1	Bacillus sp.
291	+	-	-	+	-	6	Paenibacillus
292	+	-	-	+	-	ngs	Bacillus sp.
293	-	-	-	-	-	ngs	Paenibacillus
294	+	-	-	+	-	ngs	Paenibacillus
295	-	-	-	-	-	ngs	Paenibacillus
296	-	-	-	-	-	5	Bacillus sp.
297	+	-	-	+	-	2	Bacillus safensis FO-36b
298	-	-	-	-	-	ngs	Mesorhizobium albiziae
299	-	-	-	-	-	ngs	Bacillus sp.
301	-	-	-	+	-	5	Bacillus psychrodurans
302	-	-	-	+	-	1	Bacillus sp.
303	-	-	-	+	-	5	Bacillus sp.
304	-	-	-	-	-	2	Bacillus sp.
305	-	-	-	-	-	ngs	Bacillus sp.
306	-	-	-	-	-	2	Staphylococcus epidermidis
307	+	+	-	+	-	2	Bacillus safensis FO-36b
308	-	-	-	+	-	5	Bacillus sp.
310	-	-	-	+	-	5	Bacillus sp.
311	+	+	-	+	-	5	Bacillus sp.
312	-	-	-	+	-	5	Bacillus sp.
313	+	+	-	+	-	5	Bacillus sp.
314	-	-	-	-	-	ngs	Bacillus psychrodurans
316	-	-	-	+	+	5	Bacillus herbersteinensis
317	+	+	-	+	-	ngs	Bacillus sp.
318	-	+	6.5	+	-	ngs	Bacillus sp.
319	-	-	-	-	-	5	Micrococcus
321	-	+	6.4	-	-	ngs	Staphylococcus
322	-	-	-	-	-	ngs	Staphylococcus
323	-	-	-	-	-	ngs	Bacillus herbersteinensis
324	-	-	-	-	-	3	Bacillus sp.
325	-	-	-	+	-	4	Bacillus safensis FO-36b
326	-	-	-	-	-	5	Agrococcus baldri
329	-	-	12.6	+	+	2	Bacillus pumilus
330	-	-	-	-	-	5	Bacillus pumilus
331	+	+	-	-	-	ngs	Staphylococcus epidermidis
332	+	+	-	-	-	3	Staphylococcus epidermidis
333	-	-	-	+	-	5	Paenibacillus
334	-	-	-	+	-	2	Bacillus sp.
335	-	-	-	+	-	4	Bacillus sp.
336	+	-	-	+	-	4	Bacillus sp.
337	+	-	-	+	-	4	Bacillus sp.
343	-	+	-	-	-	4	Mesorhizobium albiziae
345	-	-	28.2	+	-	4	Bacillus sp.
347	-	-	-	-	-	ngs	Stenotrophomonas panacihumi
348	-	-	-	-	-	ngs	Micrococcus
350	-	-	-	-	-	2	Bacillus sp.
351	-	-	-	+	-	1	Bacillus sp.
353	-	-	-	-	-	ngs	Bacillus herbersteinensis
355	-	+	-	+	-	5	Bacillus sp.
356	-	-	-	-	-	ngs	Bacillus sp.
358	-	-	-	+	-	5	Micrococcus
359	+	-	-	-	-	ngs	Micrococcus
360	-	-	-	-	-	5	Micrococcus
361	+	-	-	-	-	ngs	Mesorhizobium albiziae
364	-	-	-	-	-	ngs	Mesorhizobium albiziae
365	-	-	-	+	-	5	Mesorhizobium albiziae
366	-	-	-	-	-	5	Staphylococcus
367	+	-	-	+	-	4	Bacillus mycoides
368	-	+	-	+	-	2	Bacillus mycoides
369	+	-	-	+	-	2	Bacillus sp.
370	+	-	-	+	-	4	Pantoea ananatis
371	-	-	-	+	-	4	Paenibacillus
372	+	+	-	+	-	6	Bacillus sp.
373	-	-	-	-	-	5	Paenibacillus
374	-	+	-	+	+	2	Bacillus sp.
375	-	+	-	+	+	5	Bacillus sp.
376	-	+	-	+	-	ngs	Bacillus sp.
377	-	+	100.7	+	-	6	Staphylococcus
378	-	+	-	-	-	ngs	Bacillus mycoides
401	+	-	-	-	-	2	Paenibacillus
403	+	+	96.3	-	-	1	Bacillus sp.
404	+	+	-	+	-	4	Bacillus sp.
405	+	+	-	+	-	5	Bacillus sp.
406	+	+	-	+	+	4	Bacillus sp.
407	+	+	-	+	-	3	Bacillus sp.
408	+	-	-	-	-	ngs	Staphylococcus epidermidis
409	-	+	-	-	-	5	Staphylococcus epidermidis
410	-	+	-	+	-	1	Staphylococcus epidermidis
412	+	+	-	+	-	2	Bacillus sp.
414	-	+	-	-	-	4	Staphylococcus
415	-	+	-	-	-	4	Staphylococcus
418	-	+	-	-	-	3	Staphylococcus
419	-	+	-	-	-	2	Staphylococcus
420	-	+	-	-	+	ngs	Stenotrophomonas
421	-	-	-	-	-	ngs	Paenibacillus
423	-	+	-	+	-	3	Bacillus sp.
425	-	-	-	-	-	4	Bacillus sp.
426	+	+	-	+	-	4	Bacillus sp.
427	-	+	-	-	-	2	Bacillus sp.
429	-	-	-	-	-	ngs	Bacillus sp.
430	-	+	-	+	-	4	Bacillus sp.
431	-	-	-	-	-	5	Bacillus sp.
432	-	+	-	-	-	5	Bacillus sp.
433	-	-	-	-	-	1	Paenibacillus
435	-	-	-	-	-	ngs	Agrococcus baldri
437	-	-	-	-	-	ngs	Agrococcus baldri
438	-	-	-	-	-	ngs	Agrococcus baldri
439	+	-	-	-	-	5	Variovorax paradoxus
440	+	-	-	-	-	1	Curtobacterium flaccumfaciens
441	-	-	-	-	-	3	Paenibacillus
442	+	-	-	-	-	1	Paenibacillus
443	+	-	-	-	+	3	Paenibacillus
444	+	-	-	-	-	ngs	Bacillus sp.
445	+	-	-	-	-	1	Bacillus sp.
446	-	-	-	-	-	2	Bacillus mycoides
447	-	+	-	-	-	2	Bacillus sp.
448	+	-	-	-	-	4	Curtobacterium flaccumfaciens
449	+	-	-	+	-	4	Curtobacterium flaccumfaciens
450	+	-	-	-	-	5	Pantoea ananatis
451	-	-	-	-	-	2	Bacillus sp.
452	+	+	-	+	-	5	Bacillus sp.
453	-	+	-	+	-	ngs	Staphylococcus epidermidis
454	-	-	-	-	-	ngs	Bacillus sp.
455	+	+	-	-	-	1	Bacillus thuringiensis
456	-	+	-	-	+	6	Bacillus simplex
457	-	+	-	+	-	1	Staphylococcus epidermidis
458	-	+	-	-	-	5	Micrococcus
459	-	+	-	-	-	ngs	Bacillus sp.
460	-	+	-	-	-	ngs	Paenibacillus
461	-	-	-	-	-	1	Bacillus psychrodurans
462	-	-	-	-	-	2	Staphylococcus
463	-	+	-	-	-	5	Bacillus sp.
464	+	-	-	-	-	2	Bacillus sp.
465	+	+	-	-	-	6	Bacillus sp.
466	+	+	-	-	-	5	Micrococcus
467	+	-	-	-	-	5	Bacillus sp.
468	+	-	-	-	-	5	Bacillus sp.
469	+	-	-	-	-	5	Bacillus sp.
a CMC: Carboxymethyl Cellulose
b mclust: groups of response induced in A. thaliana root by bacteria and supervised by model-based clustering analysis
c ngs: not germinated seeds
